# Supplementary material for: Segmentectomy and Wedge Resection for Elderly Patients with Stage I Non-Small Cell Lung Cancer: A Systematic Review and Meta-Analysis
Source: MDPI journal article supplement (doi:10.3390/jcm11020294), 2022-01-06
Supplement: s1 [file s1]

## **Supplemental Tables and Figures**

Supplemental Table S1: Page. 2

Supplemental Table S2: Page. 3-5

Supplemental Table S3: Page. 6

Supplemental Figure S1: Page. 7

Supplemental Figure S2: Page. 8

Supplemental Figure S3: Page. 9

Supplemental Figure S4: Page. 10

Supplemental Figure S5: Page. 11

**Supplemental Table S1 The search strategy for the PubMed database (title and abstract) using search terms.**

| Set # | Search for                                                                                                                                                                                                                               | Results (April 1 <sup>st</sup> 2021) |
|-------|------------------------------------------------------------------------------------------------------------------------------------------------------------------------------------------------------------------------------------------|--------------------------------------|
| #1    | ((lung[Title/Abstract]) OR (respiratory[Title/Abstract])) OR (pulmonary[Title/Abstract])                                                                                                                                                 | 1,428,054                            |
| #2    | (((((cancer[Title/Abstract]) OR (carcinoma[Title/Abstract])) OR (adenocarcinoma[Title/Abstract])) OR (neoplasm[Title/Abstract])) OR (malignancy[Title/Abstract])) OR (ground-glass opacity[Title/Abstract])) OR (nodule[Title/Abstract]) | 2,438,579                            |
| #3    | lobectomy[Title/Abstract]                                                                                                                                                                                                                | 19,674                               |
| #4    | ((segmentectomy[Title/Abstract]) OR (wedge resection[Title/Abstract])) OR (sublobar resection[Title/Abstract]) OR (sublobectomy[Title/Abstract])                                                                                         | 7,441                                |
| #5    | ((age[Title/Abstract]) OR (old[Title/Abstract])) OR (elderly[Title/Abstract]) OR (octogenarian[Title/Abstract])                                                                                                                          | 3,467,701                            |
| #6    | ((survival[Title/Abstract]) OR (mortality[Title/Abstract])) OR (morbidity[Title/Abstract]) OR (complication[Title/Abstract]) OR (recurrence[Title/Abstract])                                                                             | 2,306,384                            |
| #7    | (((((#1 AND #2) AND #3) AND #4) AND #5) AND #6)                                                                                                                                                                                          | 496                                  |

**Supplemental Table S2. List of excluded studies with reasons for exclusion**

| First author, year | Reasons                                                 | Reference                                                                                                                                                                                                                                                                                                                                                                                           |
|--------------------|---------------------------------------------------------|-----------------------------------------------------------------------------------------------------------------------------------------------------------------------------------------------------------------------------------------------------------------------------------------------------------------------------------------------------------------------------------------------------|
| Heiden BT, 2021    | No independent data of elderly patients                 | Heiden BT, Eaton DB Jr, Engelhardt KE, Chang SH, Yan Y, Patel MR, Kreisel D, Nava RG, Meyers BF, Kozower BD, Puri V. Analysis of Delayed Surgical Treatment and Oncologic Outcomes in Clinical Stage I Non-Small Cell Lung Cancer. JAMA Netw Open. 2021 May 3;4(5):e2111613. doi: 10.1001/jamanetworkopen.2021.11613. PMID: 34042991; PMCID: PMC8160592.                                            |
| Zhang B, 2021      | Overlapping                                             | Zhang B, Liu R, Ren D, Li X, Wang Y, Huo H, Zhu S, Chen J, Song Z, Xu S. Comparison of Lobectomy and Sublobar Resection for Stage IA Elderly NSCLC Patients (≥70 Years): A Population-Based Propensity Score Matching's Study. Front Oncol. 2021 May 7;11:610638. doi: 10.3389/fonc.2021.610638. PMID: 34026604; PMCID: PMC8139614.                                                                 |
| Gooseman MR, 2021  | No independent data of elderly patients                 | Gooseman MR, Falcoz PE, Decaluwe H, Szanto Z, Brunelli A; ESTS Database Committee. Morbidity and mortality of lung resection candidates defined by the American College of Chest Physicians as 'moderate risk': an analysis from the European Society of Thoracic Surgeons database. Eur J Cardiothorac Surg. 2021 Mar 24;ezab028. doi: 10.1093/ejcts/ezab028. Epub ahead of print. PMID: 33760020. |
| Lou X, 2021        | No comparisons between lobectomy and sublobar resection | Lou X, Sanders A, Wagh K, Binongo JN, Sancheti M, Javidfar J, Pickens A, Fernandez F, Force S, Khullar O. Safety and Feasibility of Thoracoscopic Lung Resection for Non-Small-Cell Lung Cancer in Octogenarians. Innovations (Phila). 2021 Jan-Feb;16(1):68-74. doi: 10.1177/1556984520971620. Epub 2020 Nov 27. PMID: 33245249.                                                                   |
| de Ruiter JC, 2020 | No comparisons between lobectomy and sublobar resection | de Ruiter JC, Heineman DJ, Daniels JM, van Diessen JN, Damhuis RA, Hartemink KJ. The role of surgery for stage I non-small cell lung cancer in octogenarians in the era of stereotactic body radiotherapy in the Netherlands. Lung Cancer. 2020 Jun;144:64-70. doi: 10.1016/j.lungcan.2020.04.005. Epub 2020 Apr 19. PMID: 32371262.                                                                |
| Yi E, 2020         | No independent data of elderly patients                 | Yi E, Cho S, Kim K, Jheon S. Comparison of survival outcomes between sublobar resection and lobectomies in early-stage lung adenocarcinoma by propensity score matching analysis. Indian J Thorac Cardiovasc Surg. 2020 Jul;36(4):382-387. doi: 10.1007/s12055-019-00897-w. Epub 2020 Mar 3. PMID: 33061146; PMCID: PMC7525899.                                                                     |
| Fan X, 2020        | No independent data of elderly patients                 | Fan X, Liang Y, Bai Y, Yang C, Xu S. Conditional survival rate estimates of lobectomy, segmentectomy and wedge resection for stage IA1 non-small cell lung cancer: A population-based study. Oncol Lett. 2020 Aug;20(2):1607-1618. doi: 10.3892/ol.2020.11713. Epub 2020 Jun 9. PMID: 32724402; PMCID: PMC7377117.                                                                                  |
| Yaldız D, 2019     | No independent data of elderly patients                 | Yaldız D, Yakut FC, Örs Kaya Ş, Gürsoy S, Yaldız MS. The Role of Sublobar Resection in T1 N0 Non-Small-Cell Pulmonary Carcinoma. Turk Thorac J. 2020 Sep;21(5):308-313. doi: 10.5152/TurkThoracJ.2019.19064. Epub 2020 Sep 1. PMID: 33031721; PMCID: PMC7544409.                                                                                                                                    |
| Stiles BM, 2019    | Overlapping                                             | Stiles BM, Mao J, Harrison S, Lee B, Port JL, Altorki NK, Sedrakyan A. Sublobar resection for node-negative lung cancer 2-5 cm in size. Eur J Cardiothorac Surg. 2019 Nov 1;56(5):858-866. doi: 10.1093/ejcts/ezz146. PMID: 31168591.                                                                                                                                                               |
| Harrison S, 2018   | Review                                                  | Harrison S, Stiles B, Altorki N. What is the role of wedge resection for T1a lung cancer? J Thorac Dis. 2018 Apr;10(Suppl 10):S1157-S1162. doi: 10.21037/jtd.2018.03.188. PMID: 29785289; PMCID: PMC5949395.                                                                                                                                                                                        |
| Hattori A, 2017    | No independent data of elderly patients                 | Hattori A, Matsunaga T, Takamochi K, Oh S, Suzuki K. Surgical resection for clinical-stage I radiological pure-solid lung cancer that met the current high risk criteria. Jpn J Clin Oncol. 2017 Jul 1;47(7):630-638. doi: 10.1093/jjco/hyx054. PMID: 28419333.                                                                                                                                     |
| Smith CB, 2017     | No comparisons between lobectomy and sublobar resection | Smith CB, Wolf A, Mhango G, Wisnivesky JP. Impact of Surgeon Volume on Outcomes of Older Stage I Lung Cancer Patients Treated via Video-assisted Thoracoscopic Surgery. Semin Thorac Cardiovasc Surg. 2017 Summer;29(2):223-230. doi: 10.1053/j.semtcvs.2017.01.013. Epub 2017 Feb 24. PMID: 28823334.                                                                                              |

|                    |                                                                  |                                                                                                                                                                                                                                                                                                                                                                                                                                                                                                                                                                                                                            |
|--------------------|------------------------------------------------------------------|----------------------------------------------------------------------------------------------------------------------------------------------------------------------------------------------------------------------------------------------------------------------------------------------------------------------------------------------------------------------------------------------------------------------------------------------------------------------------------------------------------------------------------------------------------------------------------------------------------------------------|
| Razi SS, 2016      | Overlapping                                                      | Razi SS, John MM, Sainathan S, Stavropoulos C. Sublobar resection is equivalent to lobectomy for T1a non-small cell lung cancer in the elderly: a Surveillance, Epidemiology, and End Results database analysis. <i>J Surg Res.</i> 2016 Feb;200(2):683-9. doi: 10.1016/j.jss.2015.08.045. Epub 2015 Sep 3. PMID: 26490227.                                                                                                                                                                                                                                                                                                |
| Iwata H, 2016      | Review                                                           | Iwata H. Therapeutic strategy for small-sized lung cancer. <i>Gen Thorac Cardiovasc Surg.</i> 2016 Aug;64(8):450-6. doi: 10.1007/s11748-016-0676-6. Epub 2016 Jun 14. PMID: 27300350.                                                                                                                                                                                                                                                                                                                                                                                                                                      |
| Gulack BC, 2016    | No independent data of elderly patients                          | Gulack BC, Yang CJ, Speicher PJ, Yerokun BA, Tong BC, Onaitis MW, D'Amico TA, Harpole DH Jr, Hartwig MG, Berry MF. A Risk Score to Assist Selecting Lobectomy Versus Sublobar Resection for Early Stage Non-Small Cell Lung Cancer. <i>Ann Thorac Surg.</i> 2016 Dec;102(6):1814-1820. doi: 10.1016/j.athoracsur.2016.06.032. Epub 2016 Sep 1. PMID: 27592602; PMCID: PMC5140083.                                                                                                                                                                                                                                          |
| Husain ZA, 2015    | Overlapping                                                      | Husain ZA, Kim AW, Yu JB, Decker RH, Corso CD. Defining the High-Risk Population for Mortality After Resection of Early Stage NSCLC. <i>Clin Lung Cancer.</i> 2015 Nov;16(6):e183-7. doi: 10.1016/j.clcc.2015.04.007. Epub 2015 Apr 24. PMID: 25979646.                                                                                                                                                                                                                                                                                                                                                                    |
| Ohtsuka T, 2015    | No independent data of elderly patients                          | Ohtsuka T, Kamiyama I, Asakura K, Kohno M. Thirty-day outcomes after lobectomy or segmentectomy for lung cancer surgery. <i>Asian Cardiovasc Thorac Ann.</i> 2015 Sep;23(7):828-31. doi: 10.1177/0218492315589476. Epub 2015 Jun 12. PMID: 26071452.                                                                                                                                                                                                                                                                                                                                                                       |
| Yano M, 2015       | No independent data of elderly patients                          | Yano M, Yoshida J, Koike T, Kameyama K, Shimamoto A, Nishio W, Yoshimoto K, Utsumi T, Shiina T, Watanabe A, Yamato Y, Watanabe T, Takahashi Y, Sonobe M, Kuroda H, Oda M, Inoue M, Tanahashi M, Adachi H, Saito M, Hayashi M, Otsuka H, Mizobuchi T, Moriya Y, Takahashi M, Nishikawa S, Matsumura Y, Moriyama S, Nishiyama T, Fujii Y; Japanese Association for Chest Surgery. Survival of 1737 lobectomy-tolerable patients who underwent limited resection for cStage IA non-small-cell lung cancer. <i>Eur J Cardiothorac Surg.</i> 2015 Jan;47(1):135-42. doi: 10.1093/ejcts/ezu138. Epub 2014 Apr 3. PMID: 24699203. |
| Warwick R, 2013    | No independent data of elderly patients                          | Warwick R, Mediratta N, Shackcloth M, Page R, McShane J, Shaw M, Poullis M. Wedge resection versus lobectomy for stage 1 non-small-cell lung cancer. <i>Asian Cardiovasc Thorac Ann.</i> 2013 Oct;21(5):566-73. doi: 10.1177/0218492312466861. Epub 2013 Jul 11. PMID: 24570559.                                                                                                                                                                                                                                                                                                                                           |
| Fan J, 2013        | No comparisons between lobectomy and sublobar resection          | Fan J, Chang Z, Ye C, Zhao B, Shen G, Chai Y. Video-assisted thoracoscopic superior segmentectomy of the right lower lobe. <i>J Thorac Dis.</i> 2013 Aug;5 Suppl 3(Suppl 3):S287-8. doi: 10.3978/j.issn.2072-1439.2013.07.18. PMID: 24040541; PMCID: PMC3771586.                                                                                                                                                                                                                                                                                                                                                           |
| Dell'Amore A, 2013 | No independent data of elderly patients with Stage I lung cancer | Dell'Amore A, Monteverde M, Martucci N, Sanna S, Caroli G, Stella F, Dell'Amore D, Rocco G. Early and long-term results of pulmonary resection for non-small-cell lung cancer in patients over 75 years of age: a multi-institutional study. <i>Interact Cardiovasc Thorac Surg.</i> 2013 Mar;16(3):250-6. doi: 10.1093/icvts/ivs473. Epub 2012 Nov 23. PMID: 23178392; PMCID: PMC3568799.                                                                                                                                                                                                                                 |
| Zhang J, 2012      | No independent data of elderly patients with Stage I lung cancer | Zhang J, Xue ZQ, Chu XY, Wang YX, Zhao JH, Xu C, Yin LG. Surgical treatment and prognosis of octogenarians with non-small cell lung cancer. <i>Asian Pac J Trop Med.</i> 2012 Jun;5(6):465-8. doi: 10.1016/S1995-7645(12)60079-0. PMID: 22575979.                                                                                                                                                                                                                                                                                                                                                                          |
| Okada A, 2012      | No comparisons between lobectomy and sublobar resection          | Okada A, Hirono T, Watanabe T. Safety and prognosis of limited surgery for octogenarians with non-small-cell lung cancer. <i>Gen Thorac Cardiovasc Surg.</i> 2012 Feb;60(2):97-103. doi: 10.1007/s11748-011-0880-3. Epub 2012 Feb 12. PMID: 22327854.                                                                                                                                                                                                                                                                                                                                                                      |
| Shirvani SM, 2012  | overlapping                                                      | Shirvani SM, Jiang J, Chang JY, Welsh JW, Gomez DR, Swisher S, Buchholz TA, Smith BD. Comparative effectiveness of 5 treatment strategies for early-stage non-small cell lung cancer in the elderly. <i>Int J Radiat Oncol Biol Phys.</i> 2012 Dec 1;84(5):1060-70. doi: 10.1016/j.ijrobp.2012.07.2354. Epub 2012 Sep 11. PMID: 22975611; PMCID: PMC3776428.                                                                                                                                                                                                                                                               |
| Rivera C, 2011     | No comparisons between lobectomy                                 | Rivera C, Falcoz PE, Bernard A, Thomas PA, Dahan M. Surgical management and outcomes of elderly patients with early stage non-                                                                                                                                                                                                                                                                                                                                                                                                                                                                                             |

|                   |                                                         |                                                                                                                                                                                                                                                                                                                                                               |
|-------------------|---------------------------------------------------------|---------------------------------------------------------------------------------------------------------------------------------------------------------------------------------------------------------------------------------------------------------------------------------------------------------------------------------------------------------------|
|                   | and sublobar resection                                  | small cell lung cancer: a nested case-control study. <i>Chest</i> . 2011 Oct;140(4):874-880. doi: 10.1378/chest.10-2841. Epub 2011 Mar 24. PMID: 21436251.                                                                                                                                                                                                    |
| Ilonen IK, 2011   | No independent data of elderly patients                 | Ilonen IK, Räsänen JV, Knuuttila A, Salo JA, Sihvo EI. Anatomic thorascopic lung resection for non-small cell lung cancer in stage I is associated with less morbidity and shorter hospitalization than thoracotomy. <i>Acta Oncol</i> . 2011 Oct;50(7):1126-32. doi: 10.3109/0284186X.2011.555780. Epub 2011 Feb 11. PMID: 21314296.                         |
| Rivera C, 2011    | Lack of endpoints                                       | Rivera C, Dahan M, Bernard A, Falcoz PE, Thomas P. Surgical treatment of lung cancer in the octogenarians: results of a nationwide audit. <i>Eur J Cardiothorac Surg</i> . 2011 Jun;39(6):981-6. doi: 10.1016/j.ejcts.2010.09.022. Epub 2010 Oct 27. PMID: 21030267.                                                                                          |
| Boffa DJ, 2008    | No independent data of elderly patients                 | Boffa DJ, Allen MS, Grab JD, Gaissert HA, Harpole DH, Wright CD. Data from The Society of Thoracic Surgeons General Thoracic Surgery database: the surgical management of primary lung tumors. <i>J Thorac Cardiovasc Surg</i> . 2008 Feb;135(2):247-54. doi: 10.1016/j.jtcvs.2007.07.060. Epub 2007 Dec 21. PMID: 18242243.                                  |
| Mery CM, 2005     | Overlapping                                             | Mery CM, Pappas AN, Bueno R, Colson YL, Linden P, Sugarbaker DJ, Jaklitsch MT. Similar long-term survival of elderly patients with non-small cell lung cancer treated with lobectomy or wedge resection within the surveillance, epidemiology, and end results database. <i>Chest</i> . 2005 Jul;128(1):237-45. doi: 10.1378/chest.128.1.237. PMID: 16002941. |
| Pagni S, 1997     | No comparisons between lobectomy and sublobar resection | Pagni S, Federico JA, Ponn RB. Pulmonary resection for lung cancer in octogenarians. <i>Ann Thorac Surg</i> . 1997 Mar;63(3):785-9. doi: 10.1016/s0003-4975(96)01150-2. PMID: 9066402.                                                                                                                                                                        |
| Naunheim KS, 1994 | No comparisons between lobectomy and sublobar resection | Naunheim KS, Kesler KA, D'Orazio SA, Fiore AC, Judd DR. Lung cancer surgery in the octogenarian. <i>Eur J Cardiothorac Surg</i> . 1994;8(9):453-6. doi: 10.1016/1010-7940(94)90013-2. PMID: 7811476.                                                                                                                                                          |

**Supplemental Table S3 Quality assessment of enrolled studies according to the Newcastle-Ottawa Scale (NOS) for cohort studies.**

| Study, year      | Selection                                |                                     |                           |                                                                          | Comparability                                                   | Outcome               |                                                 |                                  | Total score |
|------------------|------------------------------------------|-------------------------------------|---------------------------|--------------------------------------------------------------------------|-----------------------------------------------------------------|-----------------------|-------------------------------------------------|----------------------------------|-------------|
|                  | Representativeness of the exposed cohort | Selection of the non-exposed cohort | Ascertainment of exposure | Demonstration that outcome of interest was not present at start of study | Comparability of cohorts on the basis of the design or analysis | Assessment of outcome | Was follow-up long enough for outcomes to occur | Adequacy of follow up of cohorts |             |
| Database studies |                                          |                                     |                           |                                                                          |                                                                 |                       |                                                 |                                  |             |
| Wang, 2020       | ★                                        | ★                                   | ★                         | ☆                                                                        | ★★                                                              | ★                     | ★                                               | ☆                                | 7           |
| Onaitis, 2018    | ★                                        | ★                                   | ★                         | ☆                                                                        | ☆★                                                              | ★                     | ★                                               | ☆                                | 6           |
| Stokes, 2018     | ★                                        | ★                                   | ★                         | ☆                                                                        | ★★                                                              | ★                     | ★                                               | ★                                | 8           |
| Shirvani, 2015   | ★                                        | ★                                   | ★                         | ☆                                                                        | ☆★                                                              | ★                     | ★                                               | ★                                | 7           |
| Cohort studies   |                                          |                                     |                           |                                                                          |                                                                 |                       |                                                 |                                  |             |
| Mimae, 2020      | ★                                        | ★                                   | ★                         | ☆                                                                        | ☆★                                                              | ★                     | ★                                               | ☆                                | 6           |
| Chen, 2018       | ★                                        | ★                                   | ★                         | ☆                                                                        | ★★                                                              | ★                     | ★                                               | ☆                                | 7           |
| Tsutani, 2018    | ★                                        | ★                                   | ★                         | ☆                                                                        | ★★                                                              | ★                     | ★                                               | ☆                                | 7           |
| Vazirani, 2018   | ★                                        | ★                                   | ★                         | ☆                                                                        | ★☆                                                              | ★                     | ★                                               | ☆                                | 6           |
| Qiu, 2017        | ★                                        | ★                                   | ★                         | ☆                                                                        | ★☆                                                              | ★                     | ★                                               | ★                                | 7           |
| Fiorelli, 2016   | ★                                        | ★                                   | ★                         | ☆                                                                        | ★★                                                              | ★                     | ★                                               | ☆                                | 7           |
| Fang, 2015       | ★                                        | ★                                   | ★                         | ☆                                                                        | ☆★                                                              | ★                     | ★                                               | ☆                                | 6           |
| Dell'Amore, 2015 | ★                                        | ★                                   | ★                         | ☆                                                                        | ☆★                                                              | ★                     | ★                                               | ★                                | 7           |
| Liu, 2014        | ★                                        | ★                                   | ★                         | ☆                                                                        | ★☆                                                              | ★                     | ★                                               | ☆                                | 6           |
| Lin, 2013        | ★                                        | ★                                   | ★                         | ☆                                                                        | ★☆                                                              | ★                     | ★                                               | ☆                                | 6           |
| Warwick, 2013    | ★                                        | ★                                   | ★                         | ☆                                                                        | ★★                                                              | ★                     | ★                                               | ★                                | 8           |
| Okada, 2012      | ★                                        | ★                                   | ★                         | ☆                                                                        | ☆★                                                              | ★                     | ★                                               | ☆                                | 6           |
| Schuchert, 2012  | ★                                        | ★                                   | ★                         | ☆                                                                        | ☆★                                                              | ★                     | ★                                               | ★                                | 7           |
| Okami, 2010      | ★                                        | ★                                   | ★                         | ☆                                                                        | ☆★                                                              | ★                     | ★                                               | ☆                                | 6           |
| Kilic, 2009      | ★                                        | ★                                   | ★                         | ☆                                                                        | ☆★                                                              | ★                     | ★                                               | ☆                                | 6           |
| Ghosh, 2003      | ★                                        | ★                                   | ★                         | ☆                                                                        | ☆★                                                              | ★                     | ★                                               | ☆                                | 6           |

A score of 7 or higher indicates a low risk of bias.

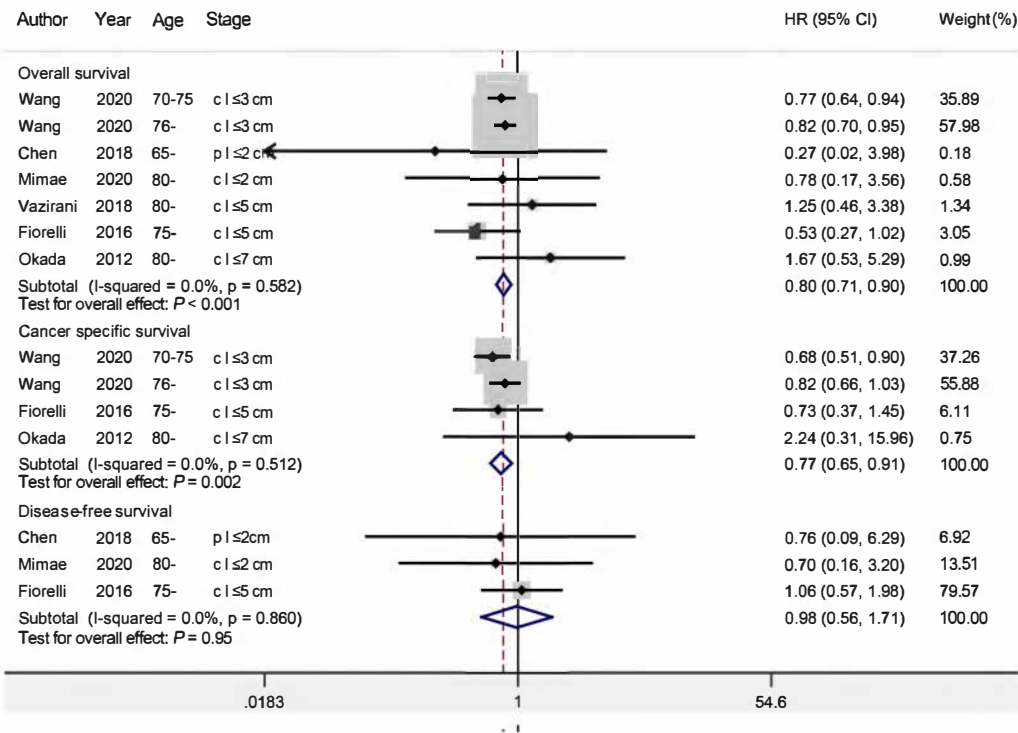

Supplemental Figure S1 Meta-analyses comparing the survival outcomes of segmentectomy with wedge resection. HR, hazard ratio; CI, confidence interval.

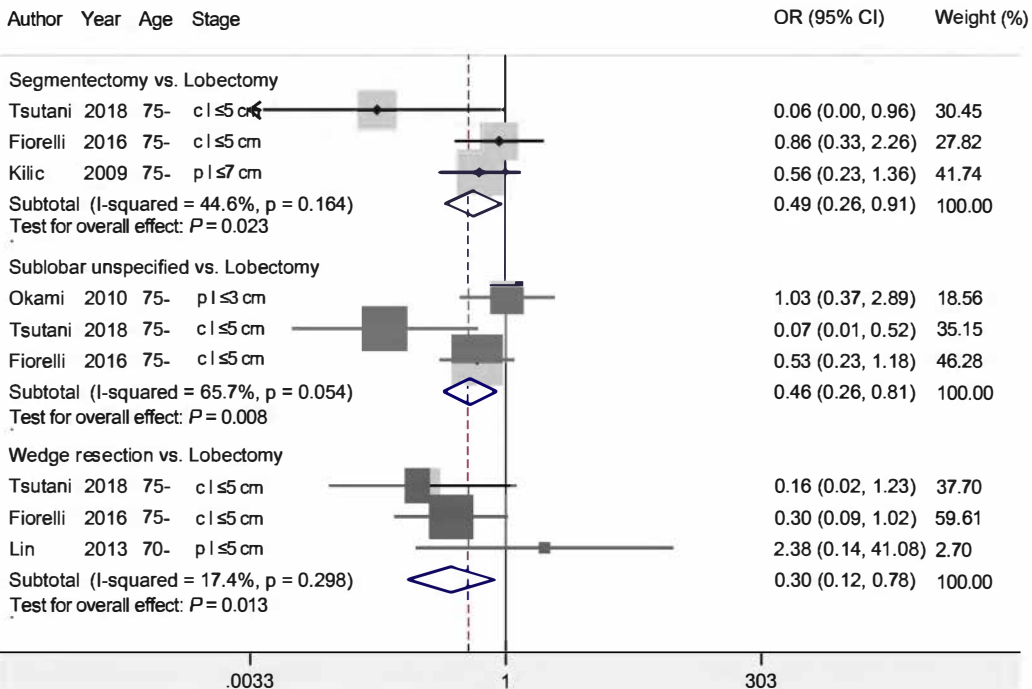

Supplemental Figure S2 Meta-analyses comparing the distant metastasis risk of sublobar resections with lobectomy. OR, odds ratio; CI, confidence interval.



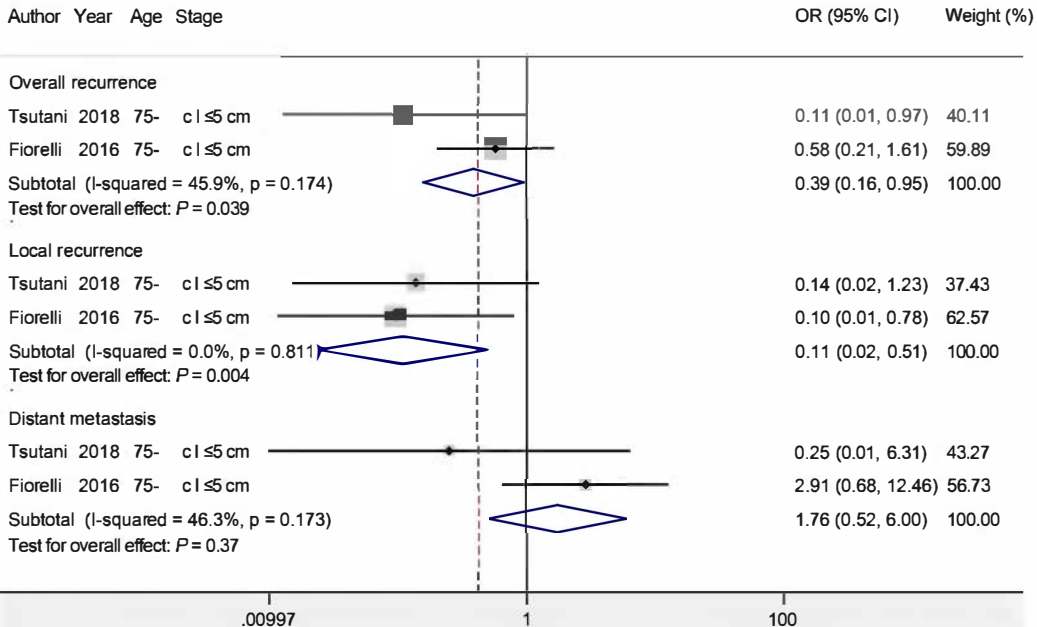

Supplemental Figure S3 Meta-analyses comparing the recurrence patterns of segmentectomy with wedge resection. OR, odds ratio; CI, confidence interval.

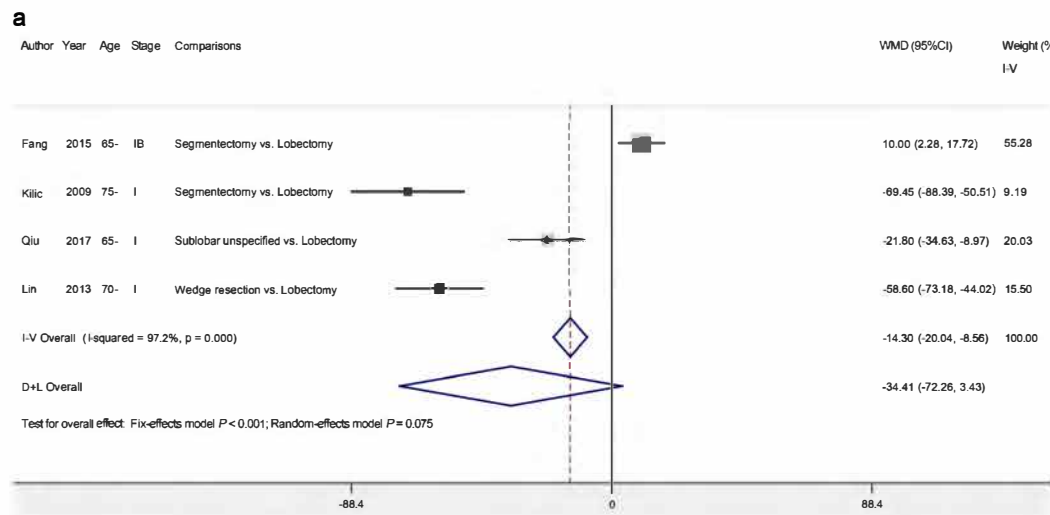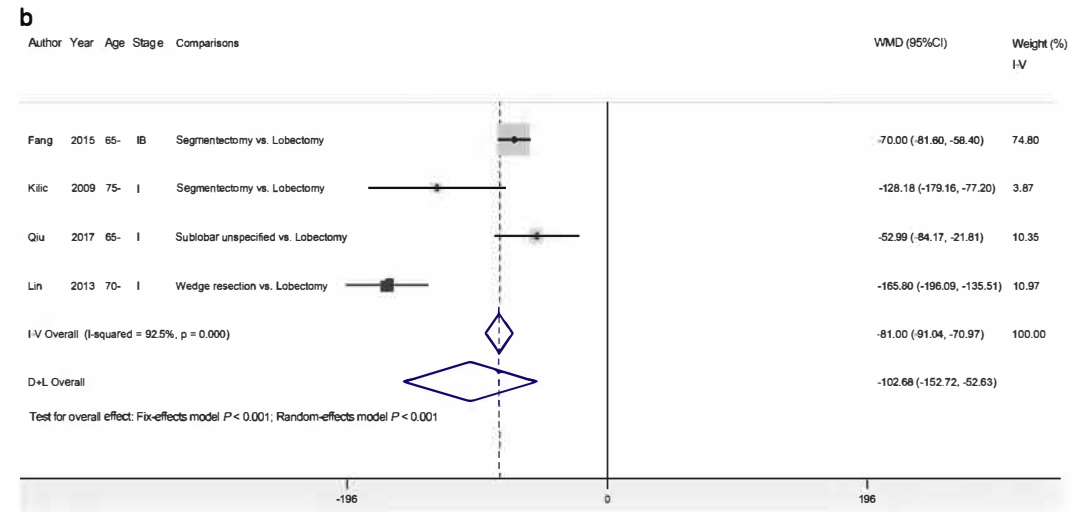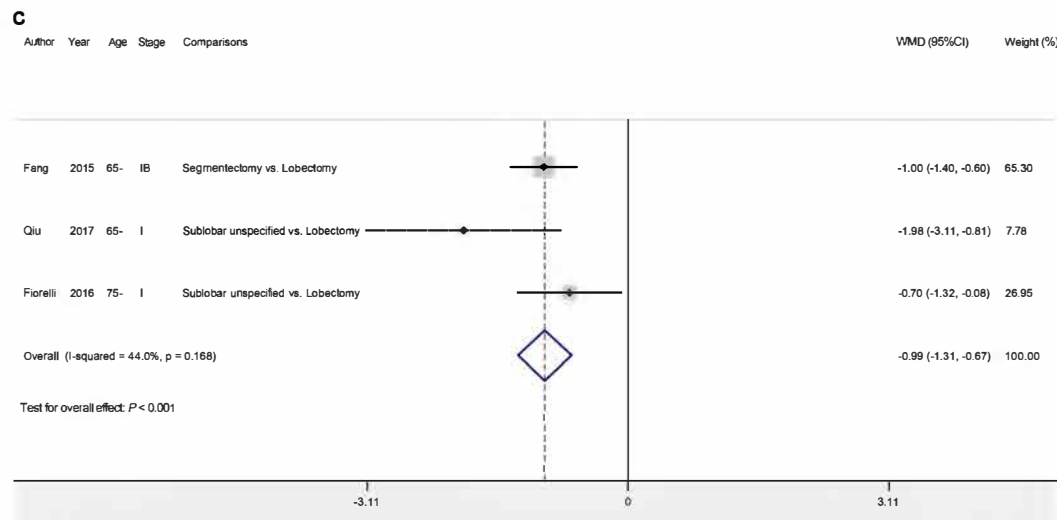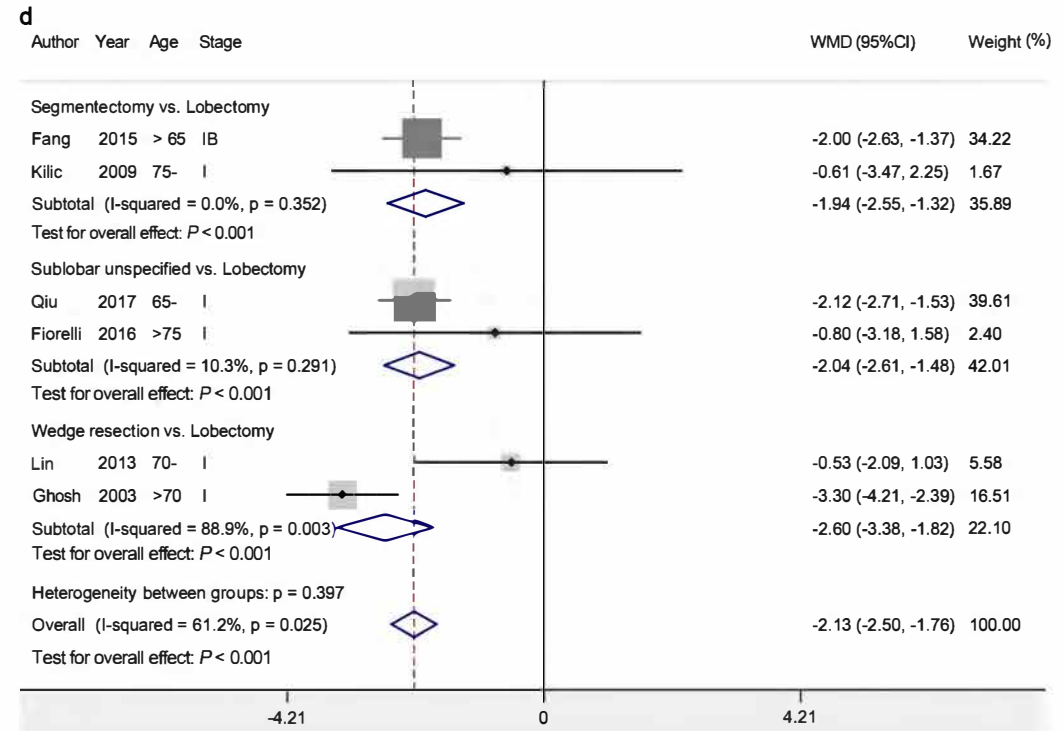

**Supplemental Figure S4** Meta-analyses comparing the operative time (a), blood loss (b), chest drainage day (c), and hospital stay (d) of sublobar resections groups with those of lobectomy group. OR, odds ratio; CI, confidence interval.

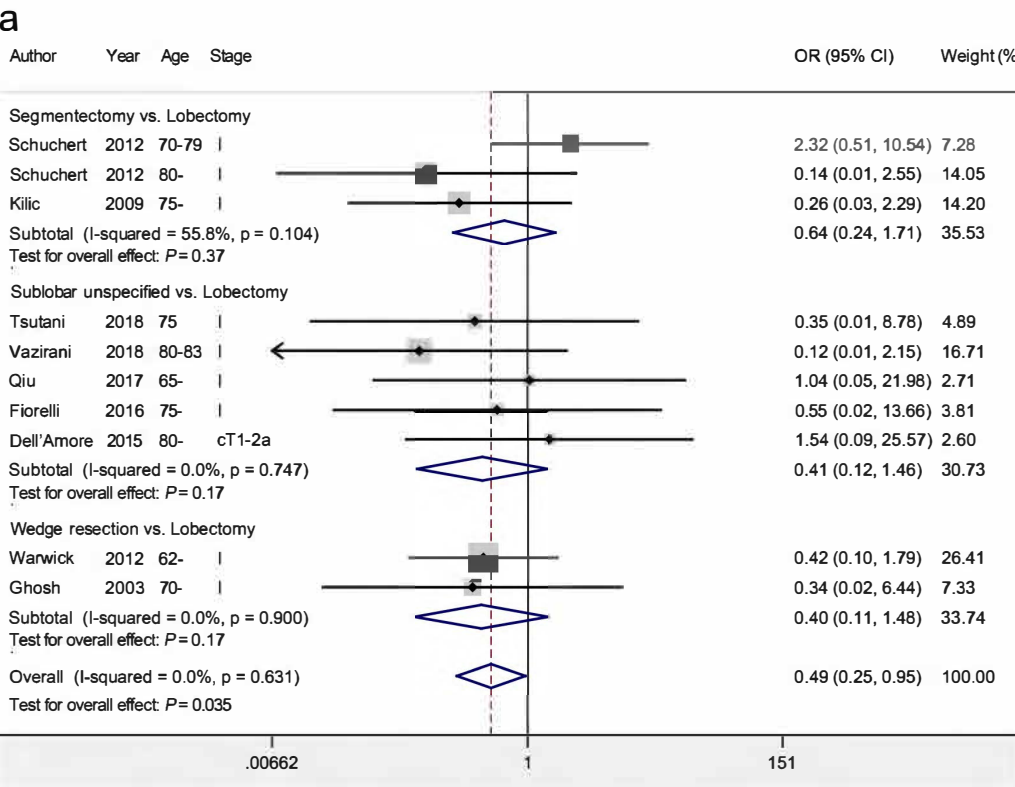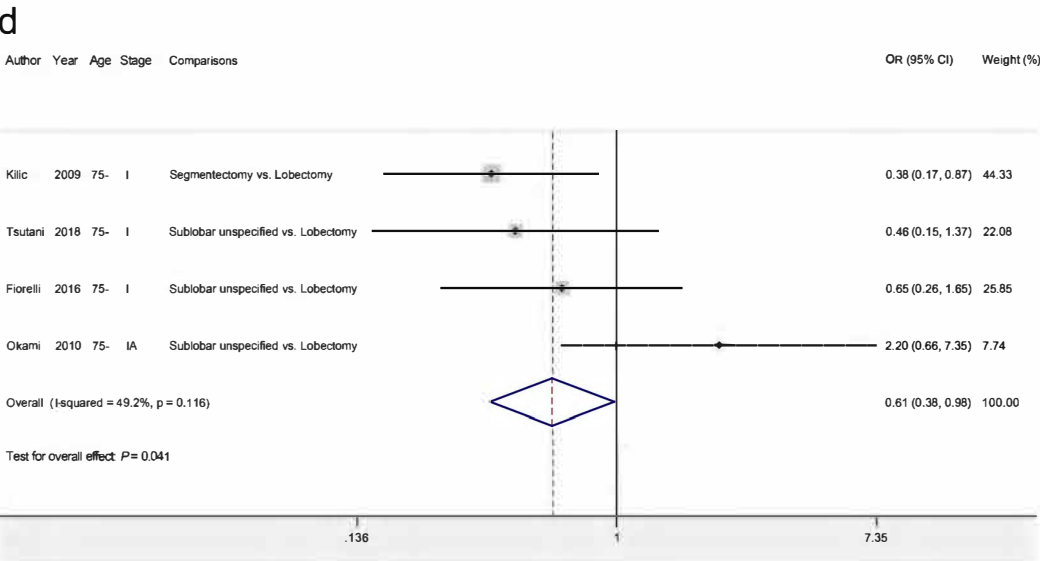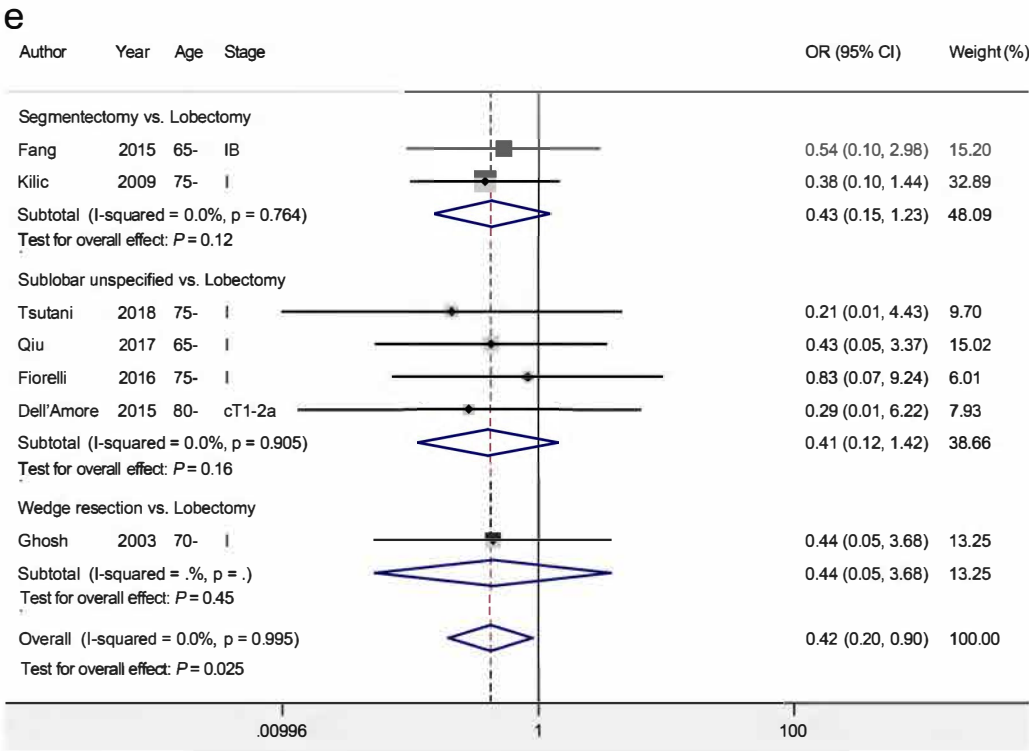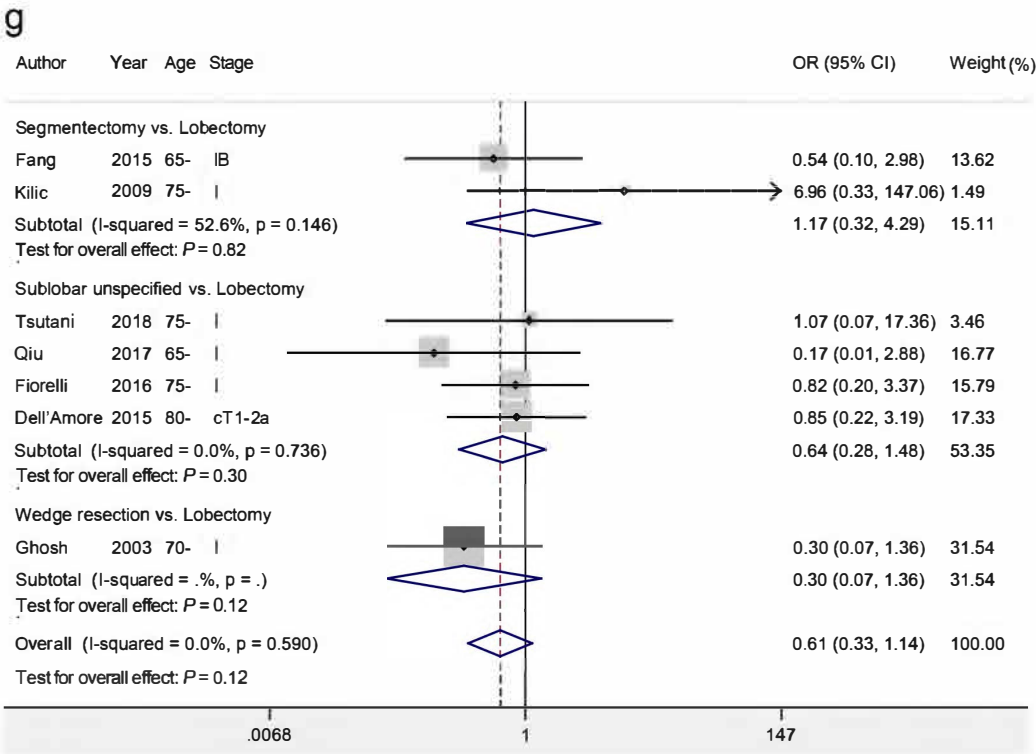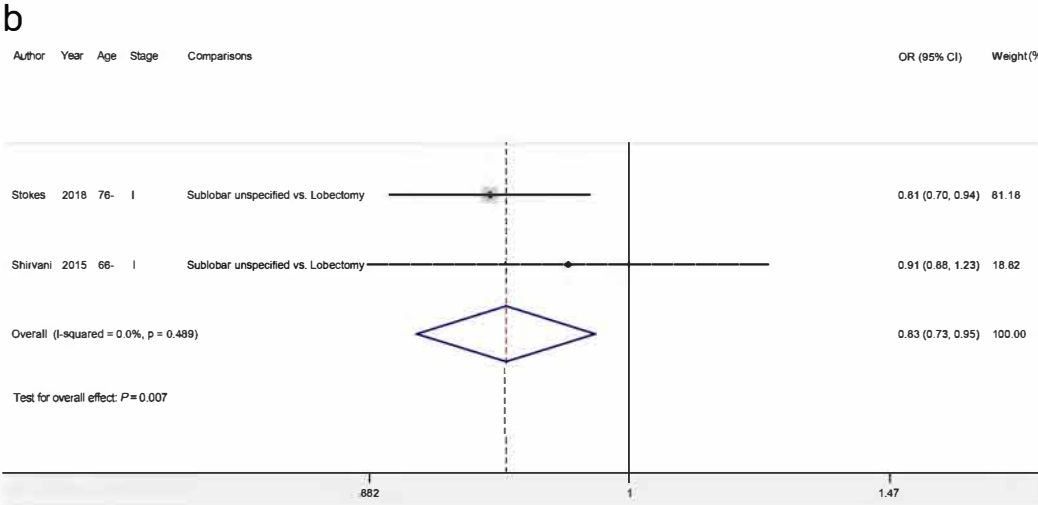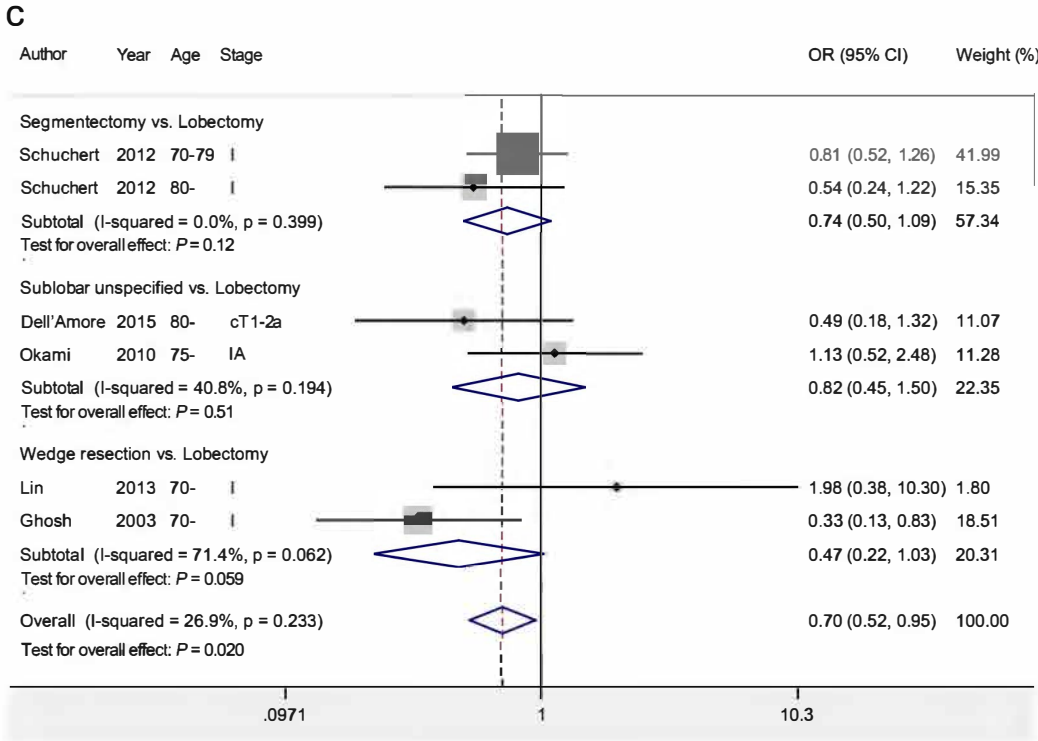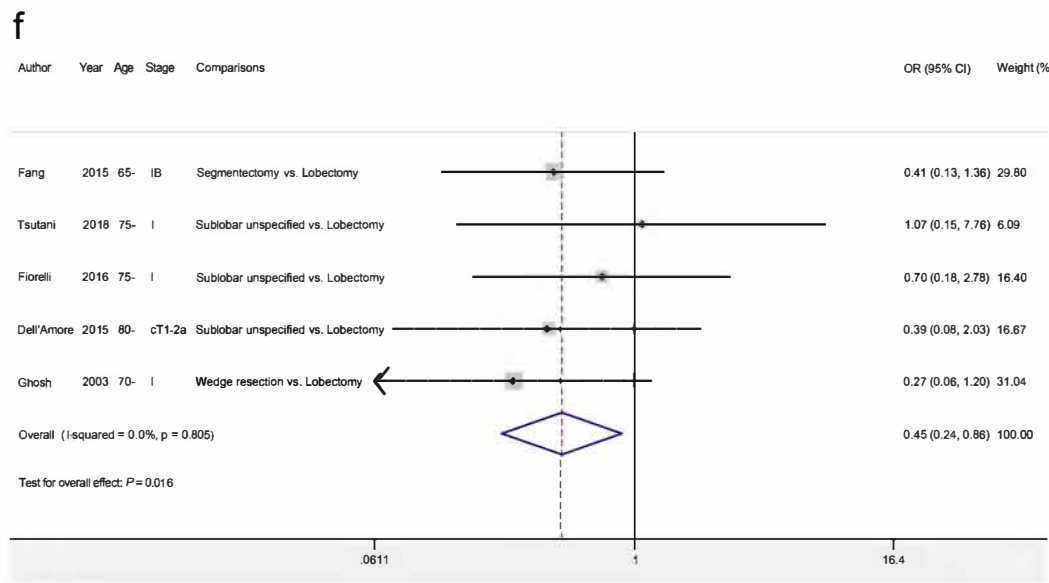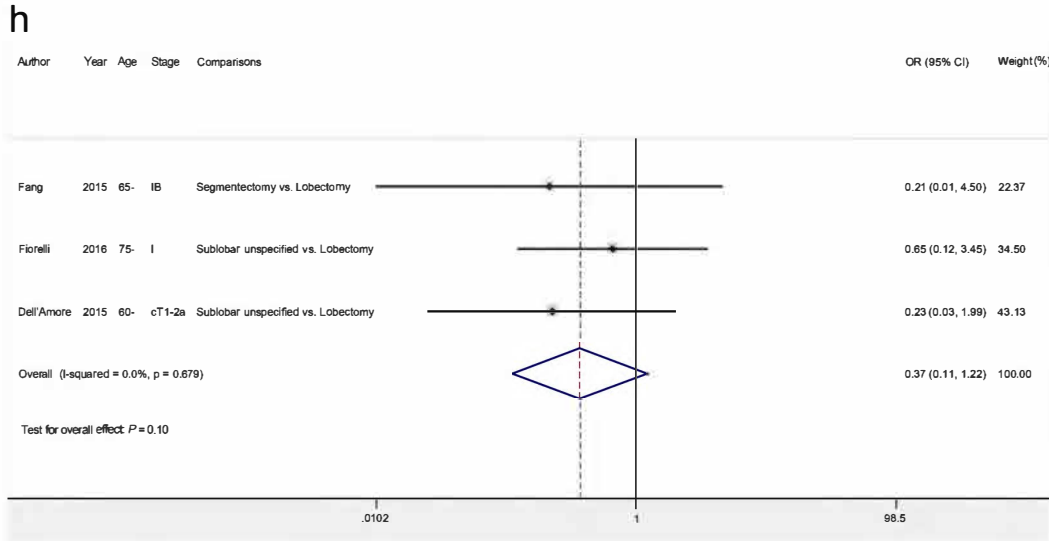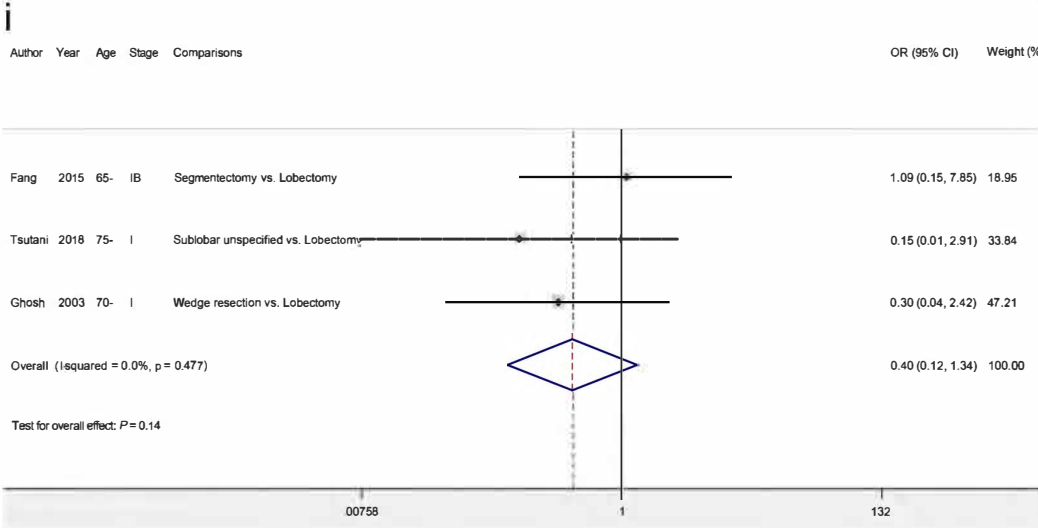

Supplemental Figure S5 Meta-analyses comparing the risk of perioperative morbidities between sublobar resection groups and lobectomy group. (a) 30-day mortality; (b) 90-day mortality; (c) overall complications; (d) severe complications; (e) pneumonia; (f) leak complications; (g) cardiac complications; (h) atelectasis; (i) empyema. OR, odds ratio; CI, confidence interval.
